# Supplementary material for: In situ polymerization of 1,3-dioxolane and formation of fluorine/boron-rich interfaces enabled by film-forming additives for long-life lithium metal batteries
Source: Royal Society of Chemistry journal article supplement (doi:10.1039/d4sc02010c), 2024-01-01
Supplement: d4sc02010c1.pdf [file d4sc02010c1.pdf]

## Supporting information

### **In-situ polymerization of 1,3-dioxolane and formation of fluorine/boron-rich interfaces enabled by film-forming additives for long-life lithium metal batteries**

*Ting Li<sup>a</sup>, Kai Chen<sup>a</sup>, Borui Yang<sup>a</sup>, Kun Li<sup>a</sup>, Bin Li<sup>a</sup>, Miao He<sup>b</sup>, Liu Yang<sup>a</sup>, Anjun Hu<sup>a,b\*</sup>, Jianping Long<sup>a\*</sup>*

<sup>a</sup> College of Materials and Chemistry & Chemical Engineering, Chengdu University of Technology, 1#, Dongsanlu, Erxianqiao, Chengdu 610059, Sichuan, P. R. China

<sup>b</sup> State Key Laboratory of Electronic Thin Films and Integrated Devices, University of Electronic Science and Technology of China, Chengdu, 610054, Sichuan, P. R. China

\* Corresponding author: [anjunhu@cdut.edu.cn](mailto:anjunhu@cdut.edu.cn) (Anjun Hu); [longjianping@cdut.cn](mailto:longjianping@cdut.cn) (Jianping Long)

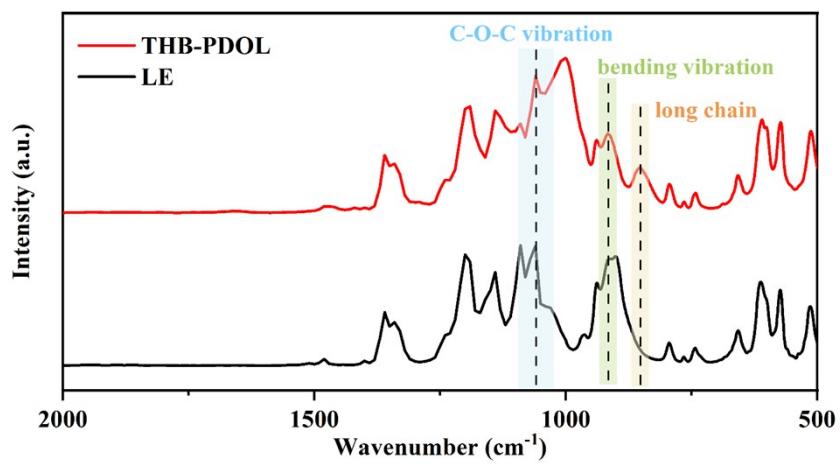

**Figure S1.** FTIR spectra of LE solvent, THB-PDOL

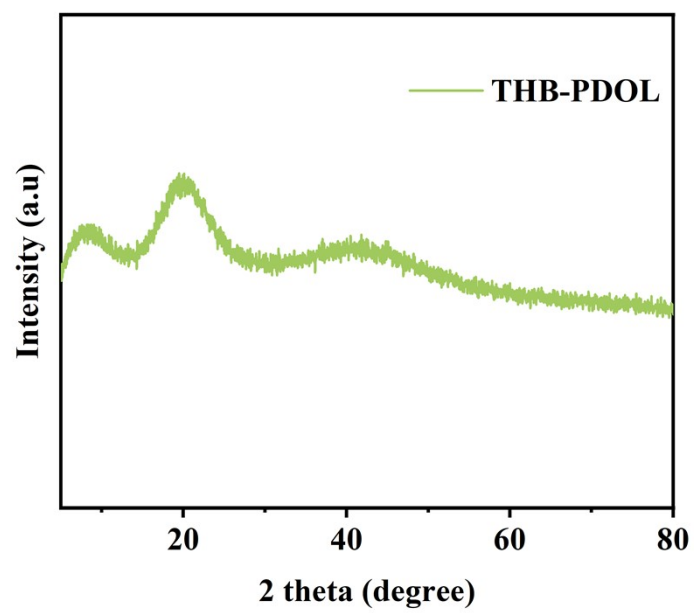

**Figure S2.** XRD pattern of THB-PDOL.

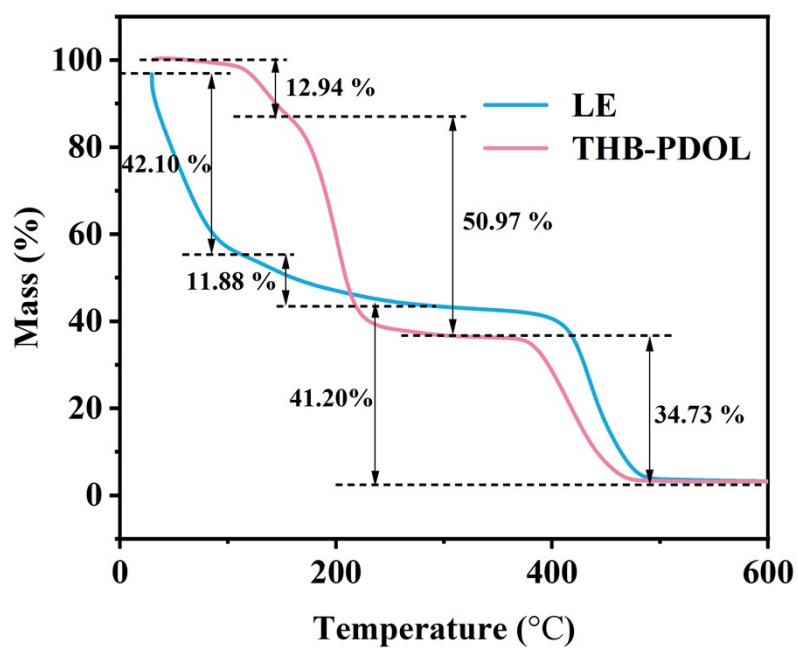

Figure S3. TG profiles of LE and THB-PDOL.

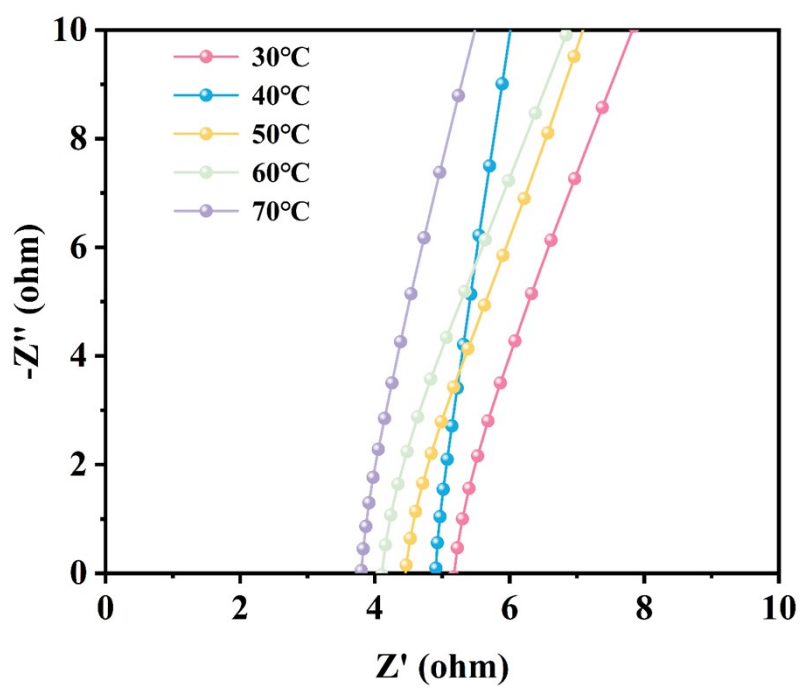

Figure S4. Impedance diagrams of THB-PDOL at different temperatures.

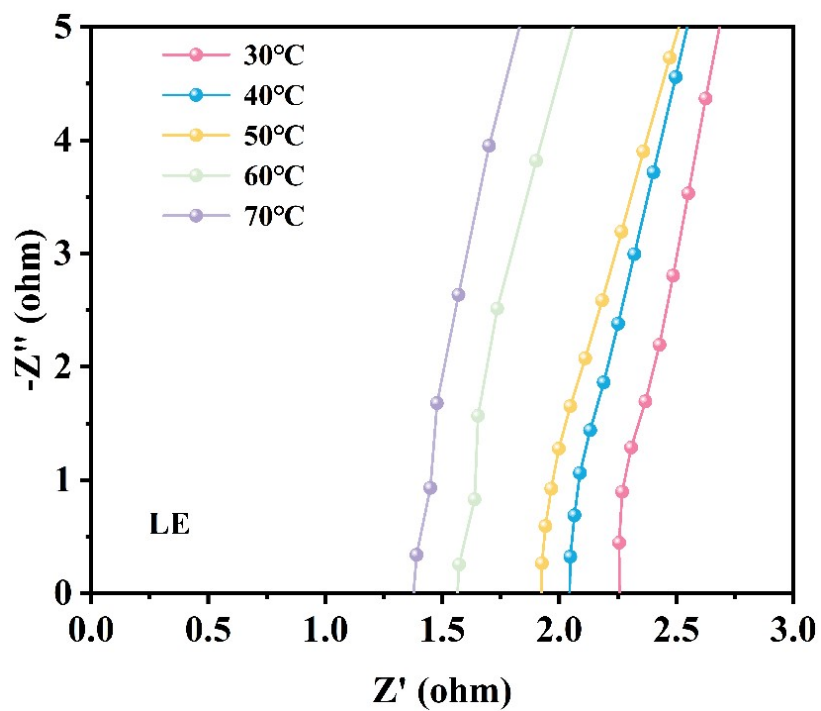

Figure S5. Impedance diagrams of LE at different temperatures.

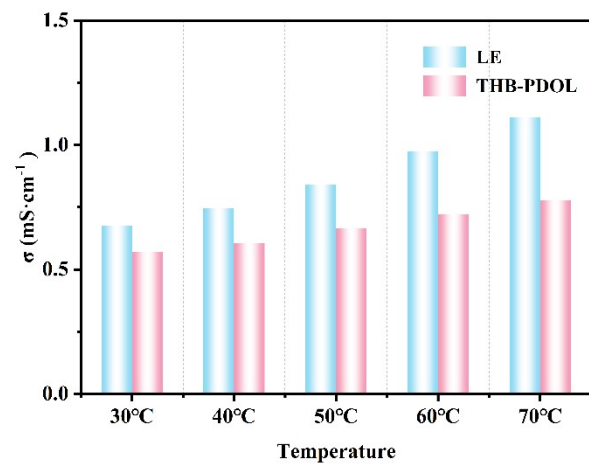

**Figure S6.** Ionic conductivity of LE and THB-PDOL at different temperatures.

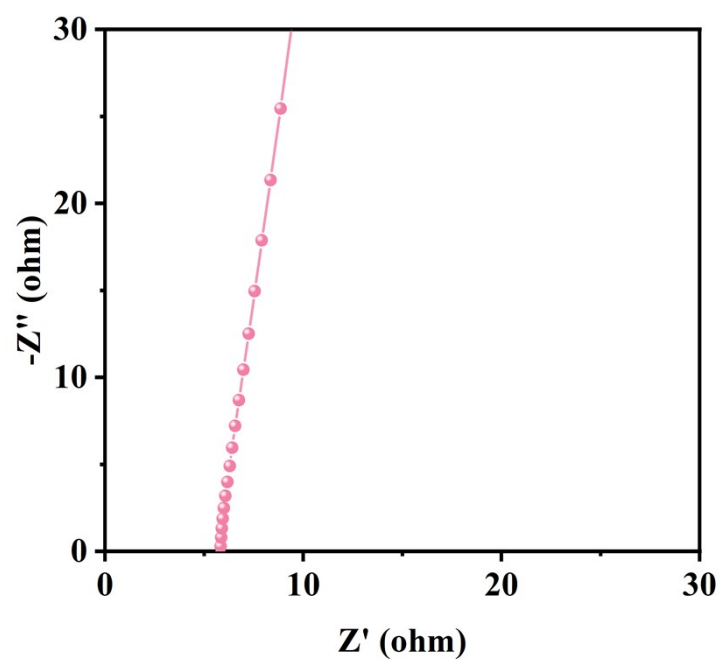

**Figure S7.** Impedance diagrams of THB-PDOL at 25°C. The calculated ionic conductivity of THB-PDOL is  $5.074 \times 10^{-4} \text{ S cm}^{-1}$ .



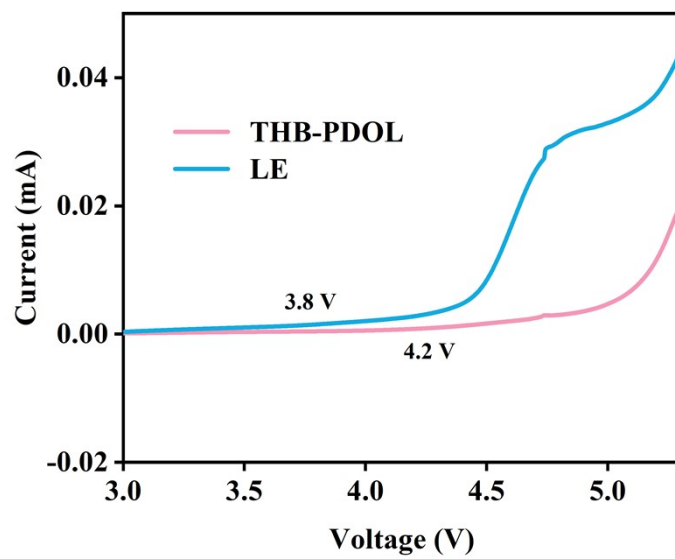

**Figure S8.** Linear sweep voltammetry (LSV) curves of THB-PDOL, and LE at room temperature.

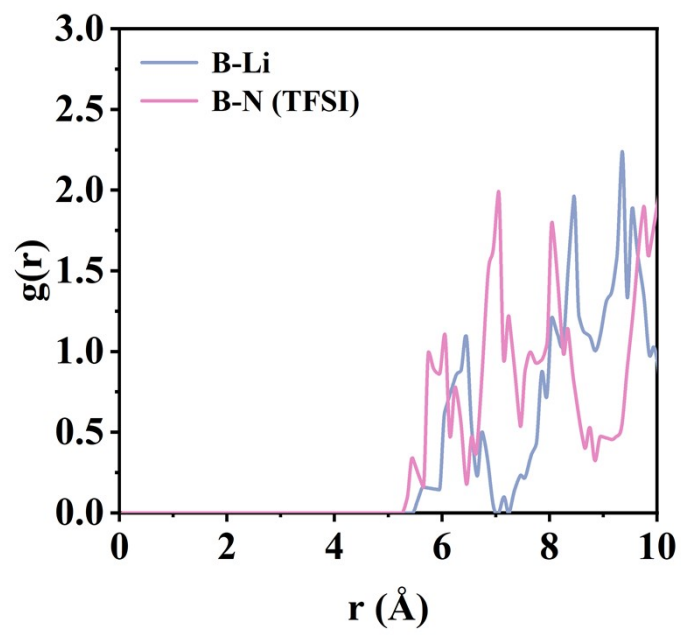

**Figure S9.** Calculation of the radial distribution function  $g(r)$  for lithium salt anions and cations in THB-PDOL.

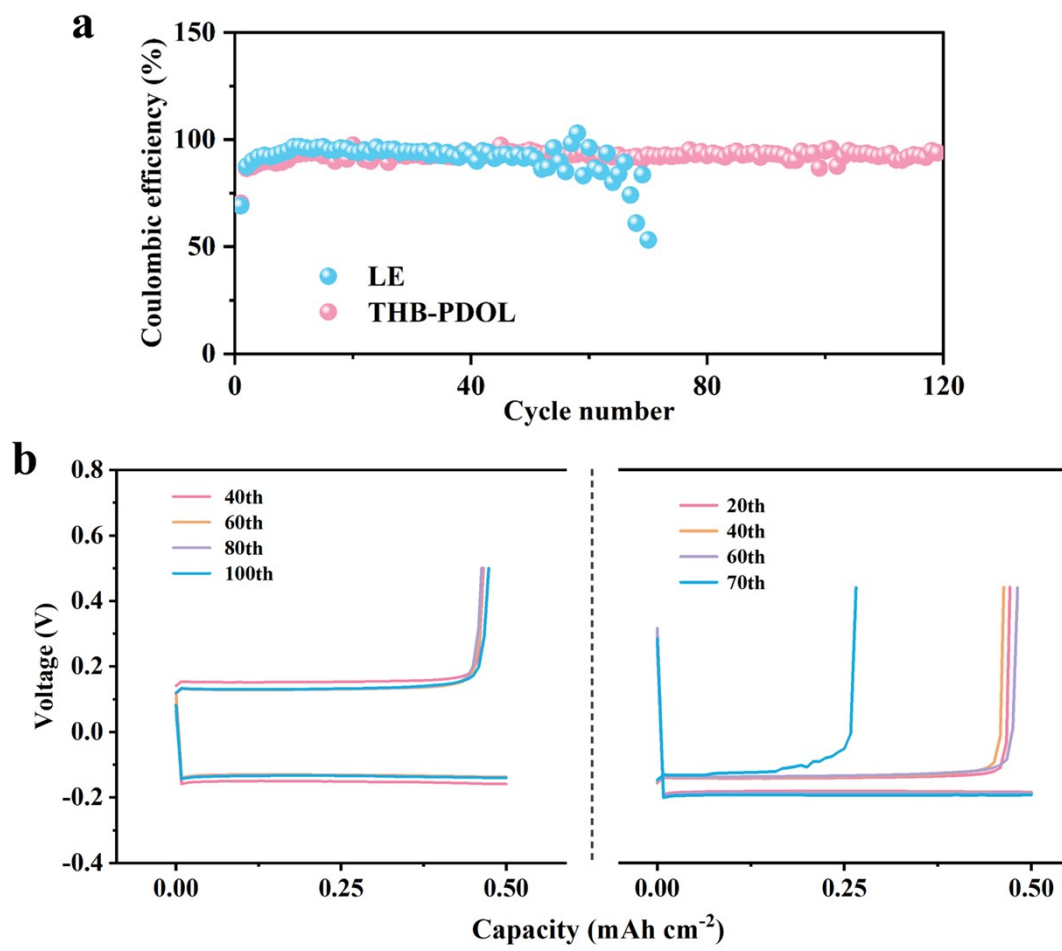

**Figure S10.** (a) Coulombic efficiency of Li||Cu asymmetric cells for THB-PDOL and LE. (b) and corresponding voltage profiles with THB-PDOL and LE.

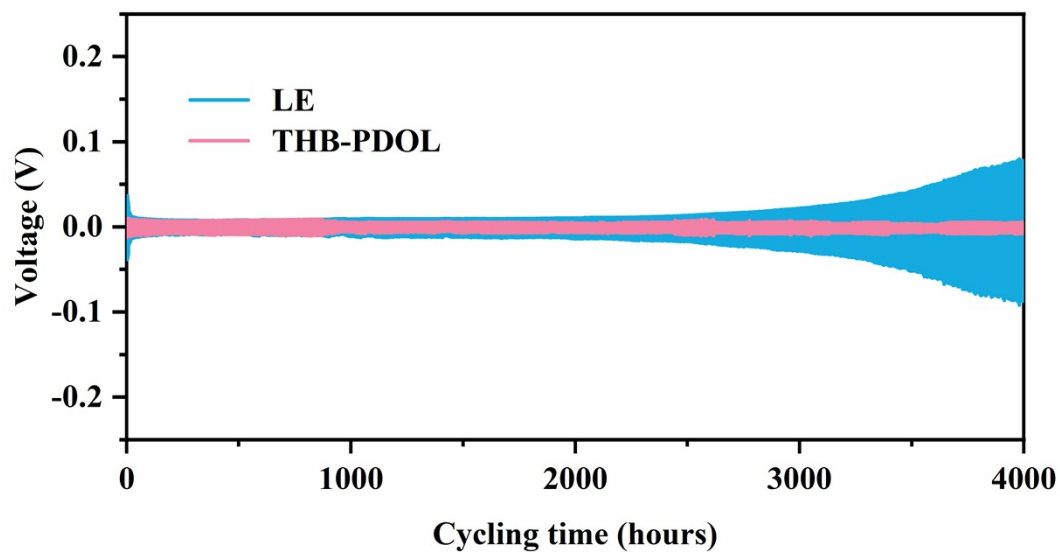

**Figure S11.** Voltage profiles of Li||Li symmetric cells of THB-PDOL and LE at a current of  $0.1 \text{ mA cm}^{-2}$  at room temperature.

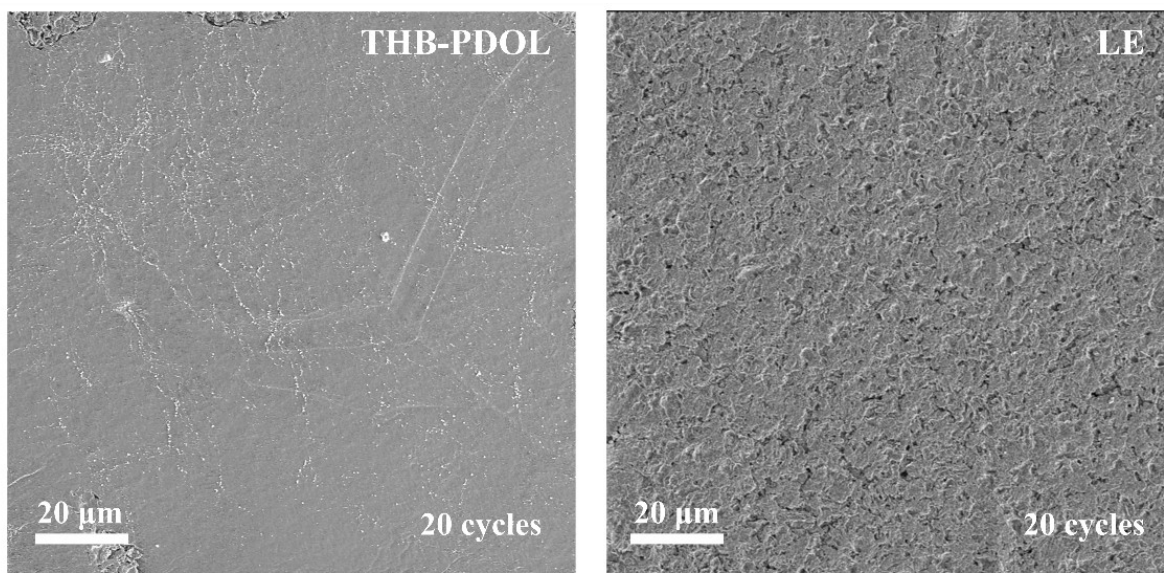

**Figure S12.** SEM images of lithium metal anode surfaces of THB-PDOL and LE after 20 cycles at current density of  $0.5 \text{ mA cm}^{-2}$  with a capacity of  $0.5 \text{ mAh cm}^{-2}$ .

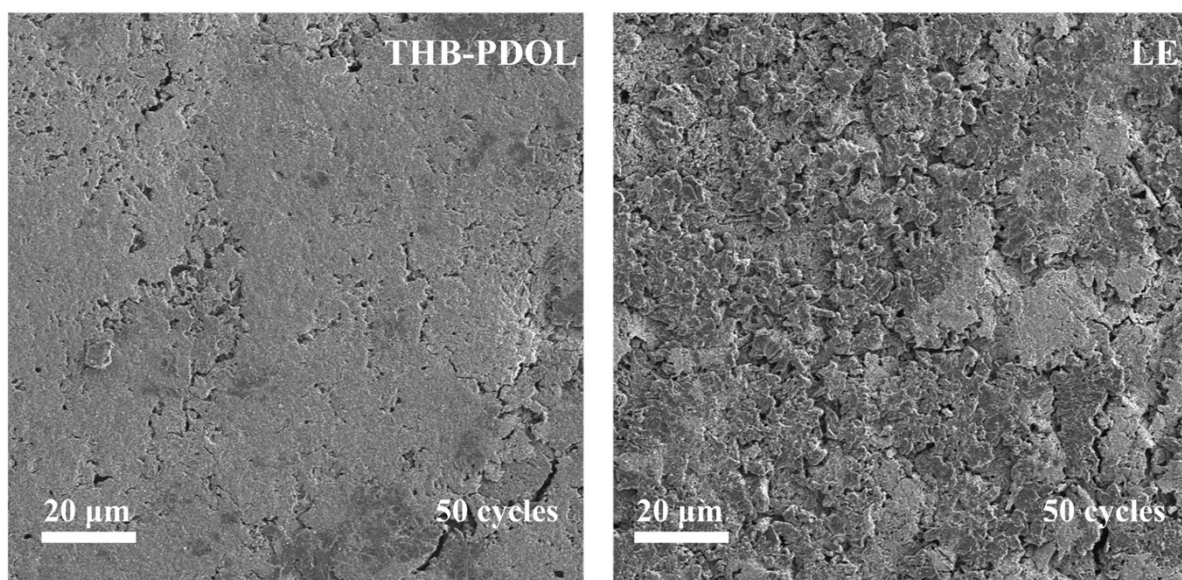

**Figure S13.** SEM images of lithium metal anode surfaces of THB-PDOL and LE after 50 cycles at  $0.5 \text{ mA cm}^{-2}$ ,  $0.5 \text{ mAh cm}^{-2}$  current densities, Scale bar:  $20 \text{ }\mu\text{m}$ .

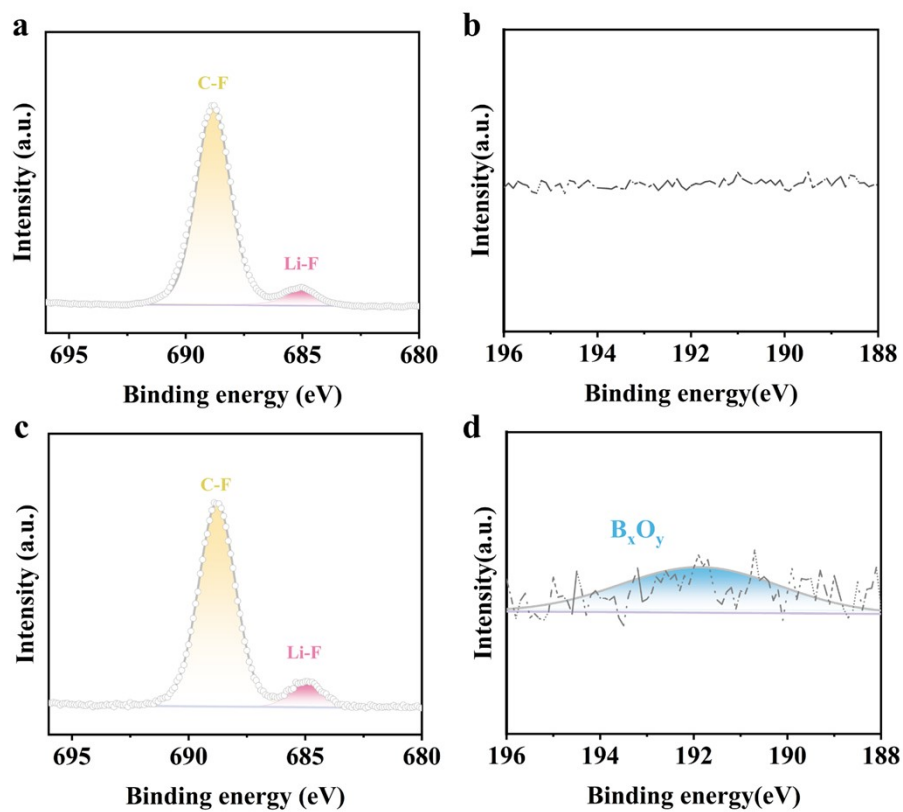

**Figure S14.** XPS spectra corresponding to F 1s, B 1s of Li metal after 20 cycles of Li||Li symmetrical cells at 0.5 mA cm<sup>-2</sup> with a capacity of 0.5 mAh cm<sup>-2</sup> in (a and b) LE and (c and d) THB-PDOL.

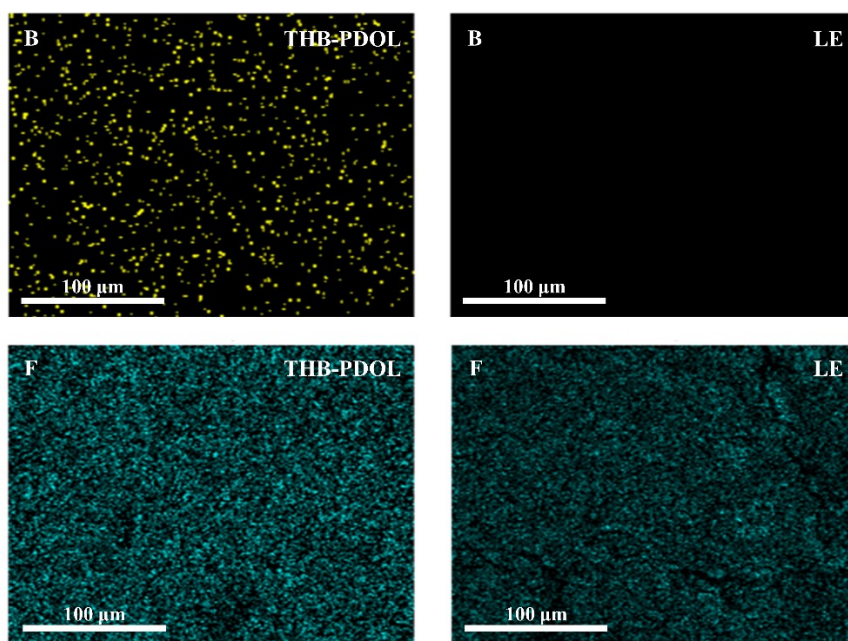

**Figure S15.** EDS mapping of lithium anode surface after cycling



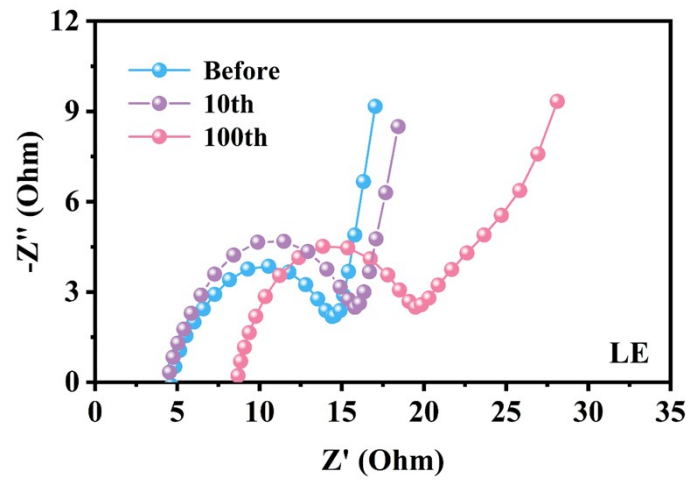

Figure S16. EIS curve of Li||LE||LFP at 1 C.

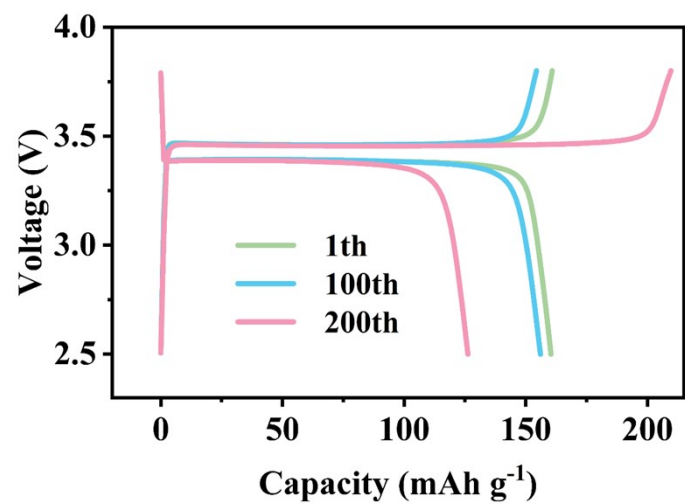

**Figure S17.** The charge–discharge voltage curve of Li||LE||LFP full cell during 200 cycles.

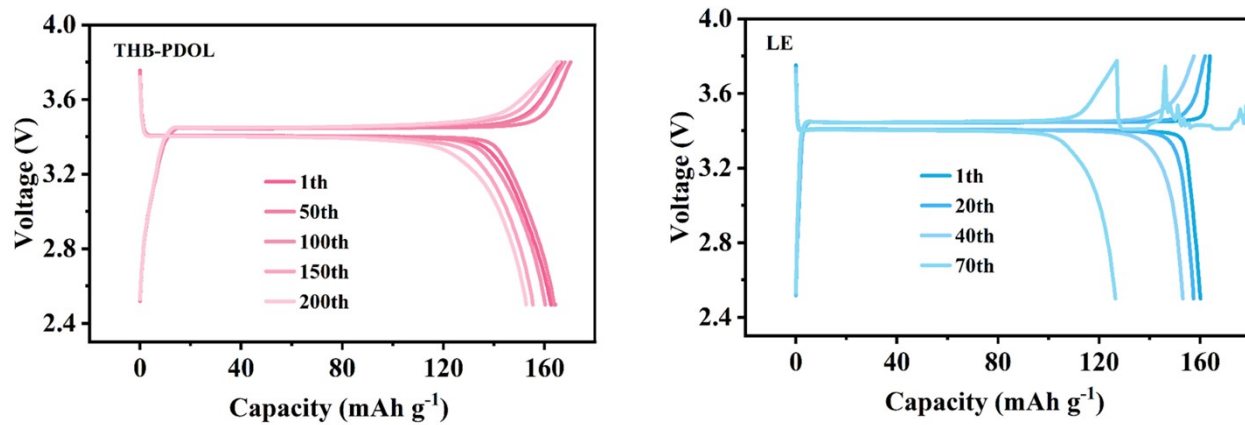

**Figure S18.** The charge–discharge voltage curve of Li||THB-PDOL||LFP and Li||LE||LFP full cells at 60°C.

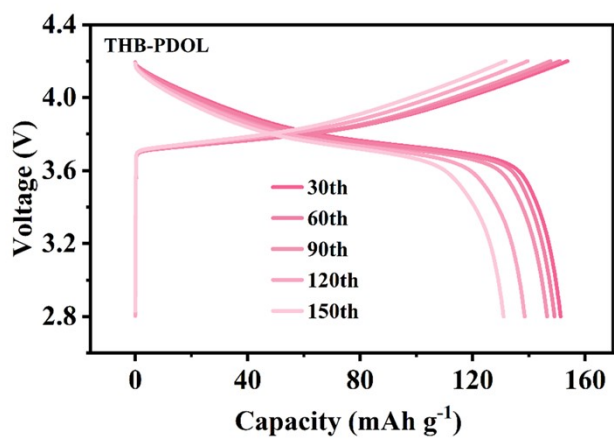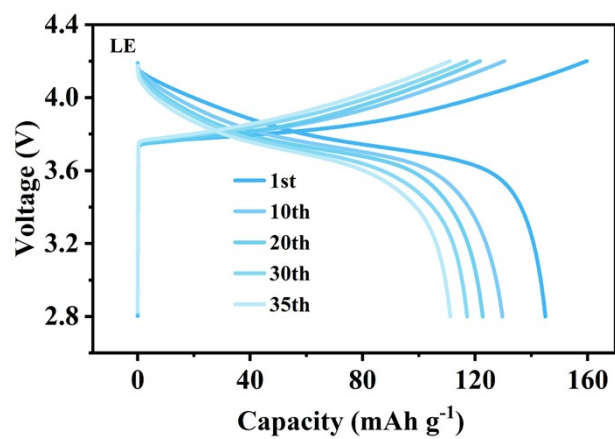

**Figure S19.** The charge–discharge voltage curve of Li||THB-PDOL|NCM523 and Li||LE|NCM523 full cells.

**Table S1.** Atomic concentration of B elements.

| <b>Sample</b>   | <b>At% (B)</b> | <b>At% (F)</b> |
|-----------------|----------------|----------------|
| <b>LE</b>       | 0.00           | 18.68          |
| <b>THB-PDOL</b> | 4.06           | 23.08          |
